# Supplementary material
Source: PubMed Central journal article supplement (PMC7855949)

[HD] = 0%

4%

8%

16%

Tau low salt

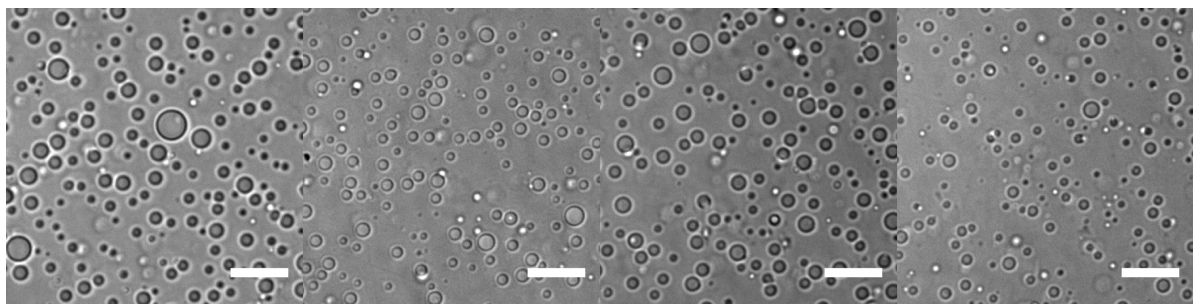

Tau RNA

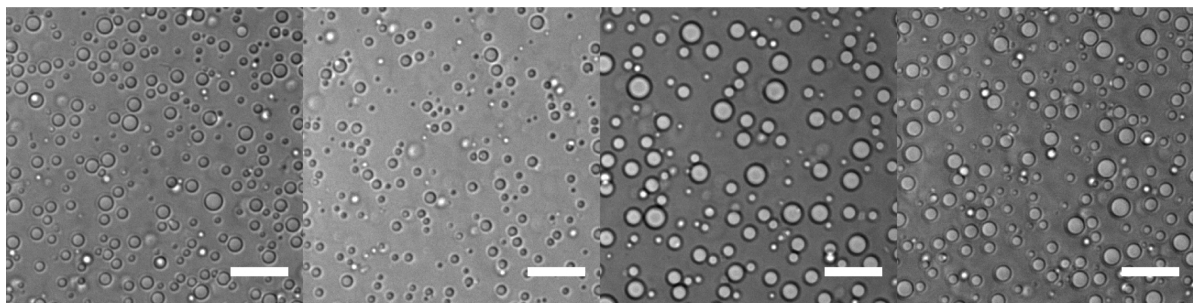

Tau high salt

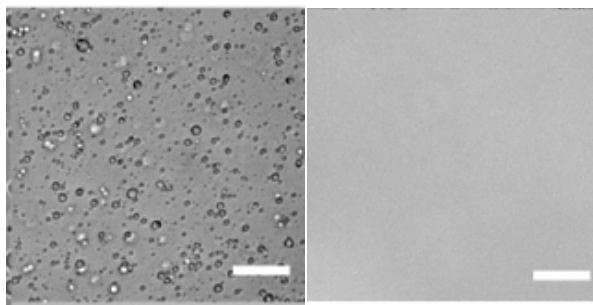

Supplement: NIHMS1657453-supplement-2.pdf [file NIHMS1657453-supplement-2.pdf]
